# Supplementary material
Source: Springer Nature journal article supplement (https://www.springermedizin.de/resource/supplementary/12937_2007_156_MOESM2_ESM.pdf/25654516)

# ROC Curve

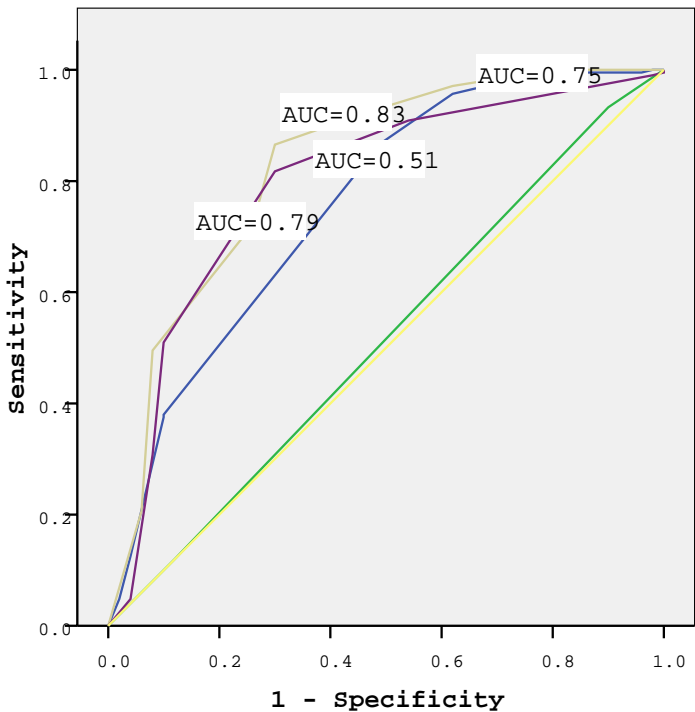

Source of the Curve

mnaanthrol

mnaglobal1

mnadietary1

mnaself1

Reference Line

Supplement: MOESM2 [file 25654516]
